# Supplementary material for: Experimental toolbox for quantitative evaluation of clathrin-mediated endocytosis in the plant model Arabidopsis
Source: Oxford University Press journal article supplement (doi:10.1242/jcs.248062), 2020-07-02
Supplement: jcs248062supp.pdf [file jcs248062supp.pdf]

## Supplemental Figures

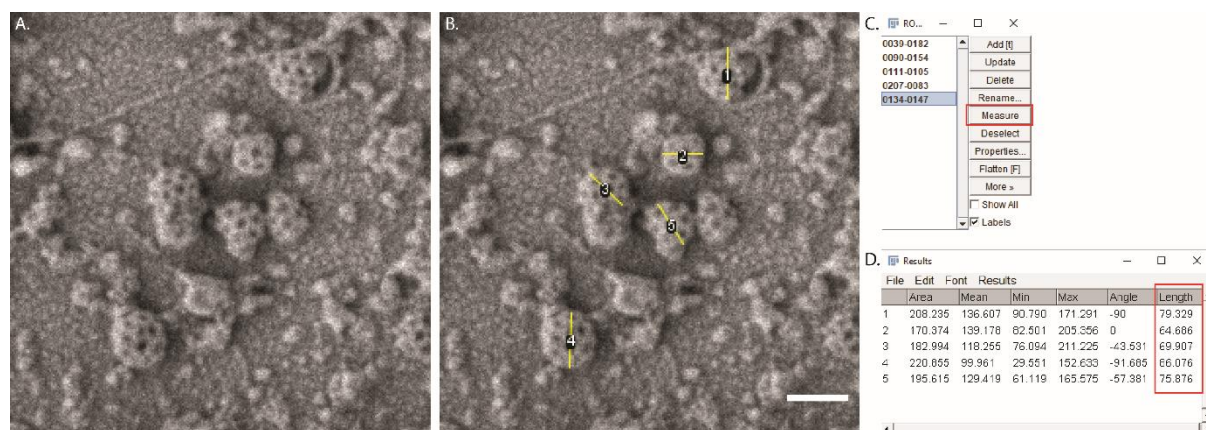

**Figure S1 – Measuring the size of CCVs in replica SEM images.** (Related to Figure 2).

A) Example CCSs captured by SEM of *Arabidopsis* protoplast metal replicas. B) Line ROIs draw over the diameter of each clearly identify CCS (yellow lines). Scale bar = 100 nm. C) Fiji ROI manager, the red rectangle highlights the measure button used to determine the length of all the ROIs. D) The results of the ROI measurements, the red rectangle highlights the length column of the ROIs.

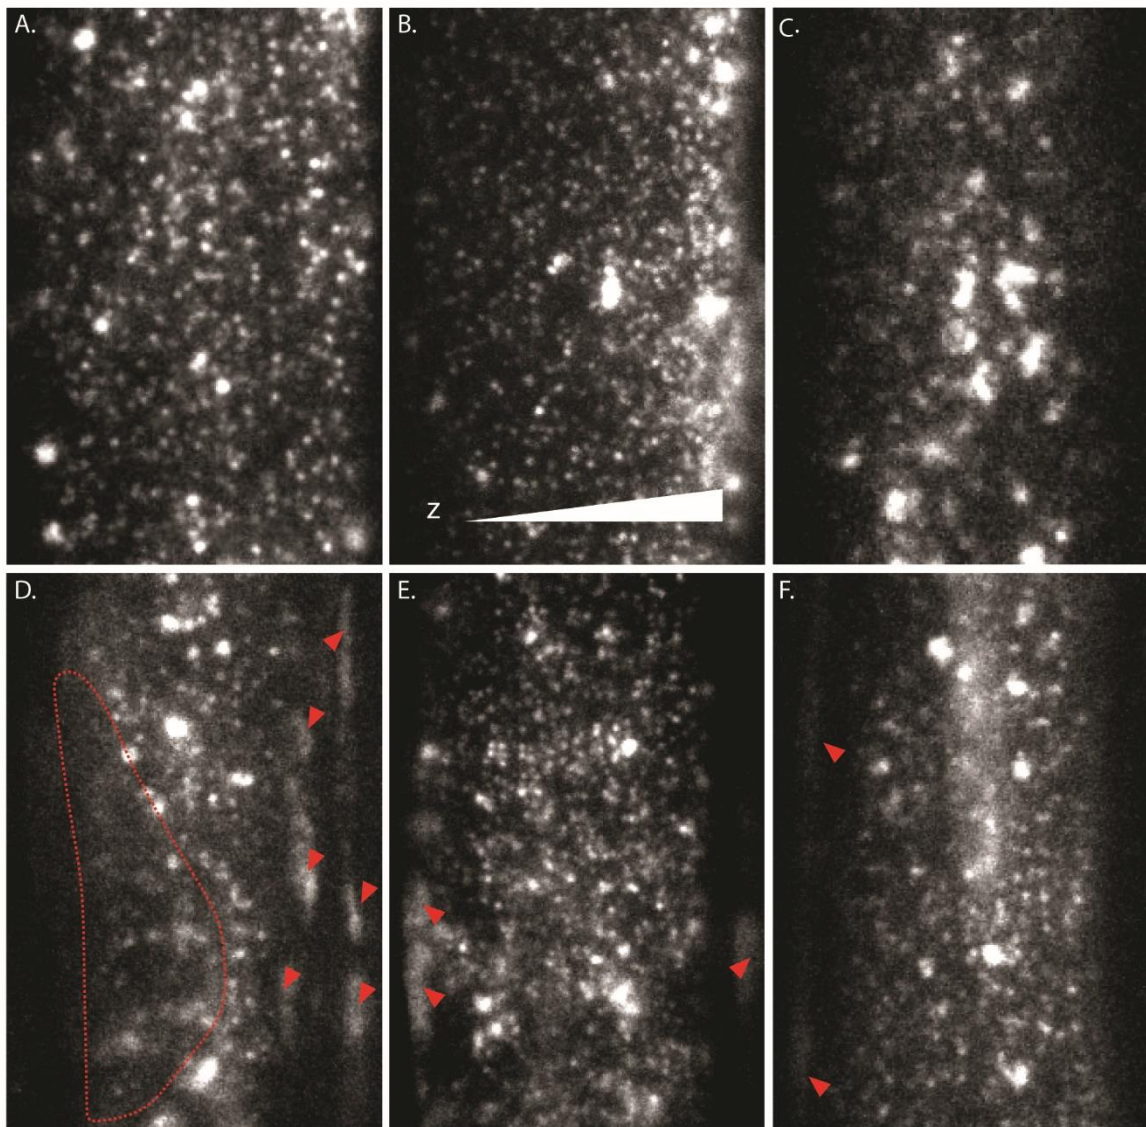

**Figure S2 – Comparison of quality of TIRF-M images.** (Related to Figures 3, 4 and 5).

Representative TIRF-M image of the epidermal root cells expressing CLC2-GFP. A) shows a good example where the image has a uniform field of illumination across the whole image, and there is an absence of static auto fluorescent signals. Poor examples of TIRF-M images; B) shows image where the TIRF angle is not correctly set, and HILO/VAEM is being used. It is evident based on the non-uniformity of penetration depth of the illumination (white triangle indicates the increase in z penetration), C) shows an out of focus image, D) shows a cell without a flat contact on the coverslip (red dashed line depicts out of contact areas), additionally red arrows note static autofluorescence signals in the field of view, E) shows an image with static autofluorescence signals in the field of view (red arrows), F) shows an image where there is interference of the TIRF-M illumination producing a uniform image of the PM (red-dashed line) and F). Scale bar = 5  $\mu\text{m}$ .

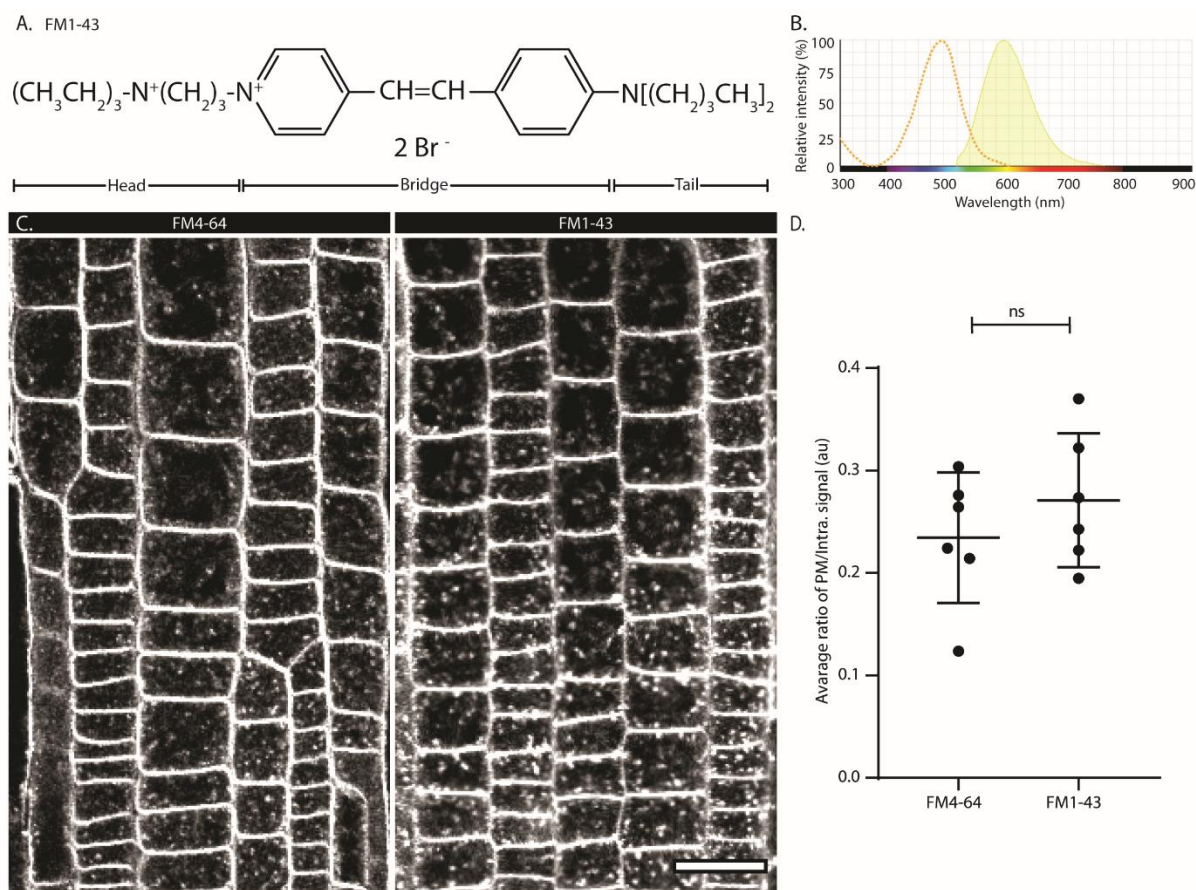

**Figure S3 – Comparison of the membrane internalization using FM4-64 and FM1-43.**  
(Related to Figure 6).

A) Chemical structure of FM1-43. B) The fluorescent spectra of FM1-43 (adapted from ThermoFisher bioscience Fluorescence SpectraViewer). C) Representative confocal images of epidermal root cells incubated with FM4-64 and FM1-43. Scale bar = 20  $\mu\text{m}$ . D) Quantification of FM uptake as determined by the ratio of PM and intra-cellular signal. Plots are mean  $\pm$  SEM. N, FM4-64 = 6 individual seedlings, 231 cells; FM1-43 = 6 individual seedlings, 139 cells. T-test,  $p$ -value = 0.3501.



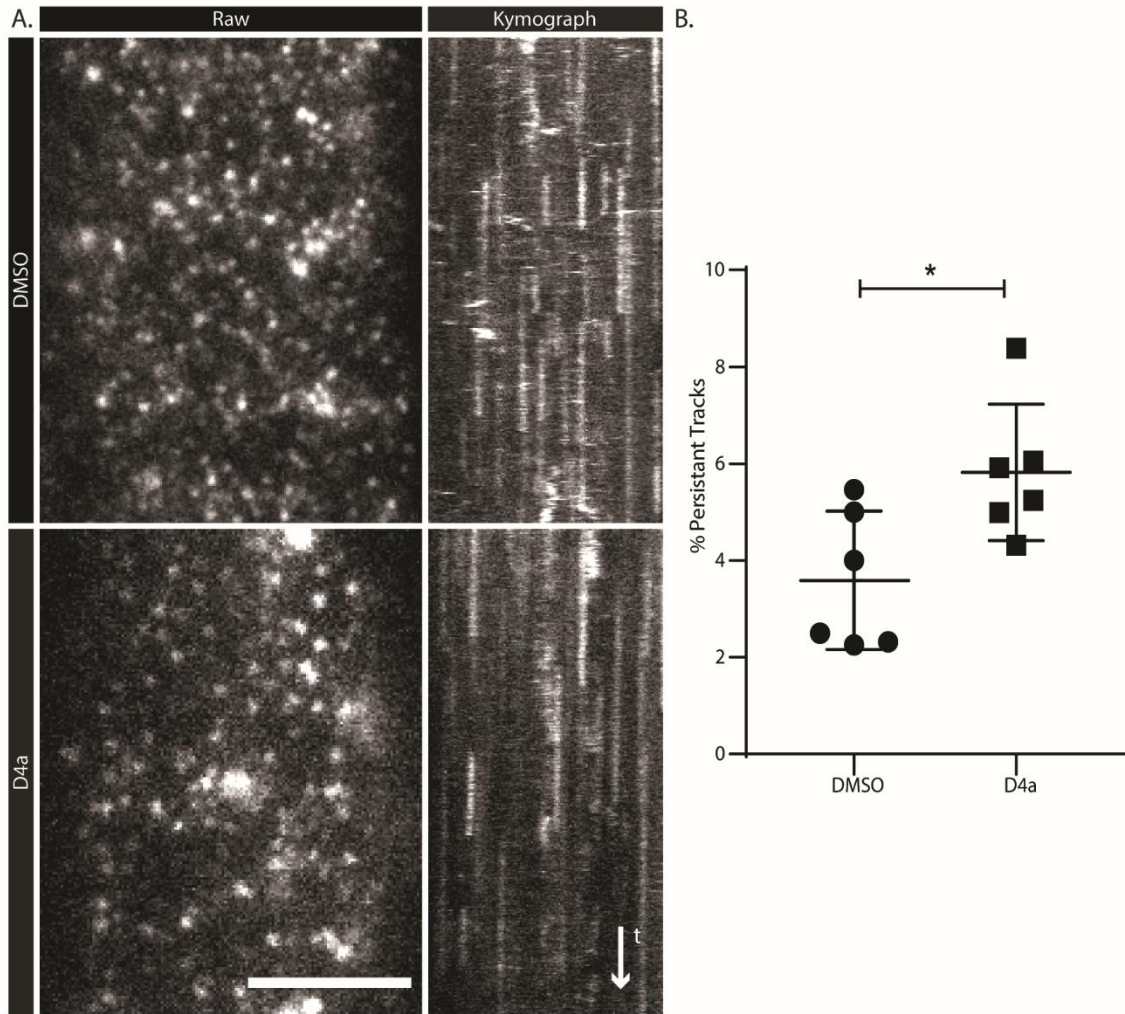

**Figure S4 – Effect of Dyngo 4a on CLC-GFP Dynamics.**

A) Example of TIRF-M images from the root epidermal cells expressing CLC2-GFP; comparison of mock (DMSO) (upper row) and treatment (Dyngo 4a (D4a), 30 $\mu$ M, 15 min) (lower row). Representative kymographs show the effect of treatment on the PM dynamics of CLC2-GFP. Scale bar = 5  $\mu$ m. B) Quantification results from combined data of persistent tracks. Plots are mean  $\pm$  SEM. N, DMSO = 6 cells from independent roots, 4491 tracks; Dyngo 4a = 6 cells from independent roots, 4700 tracks. T-test, p-value = 0.0217.

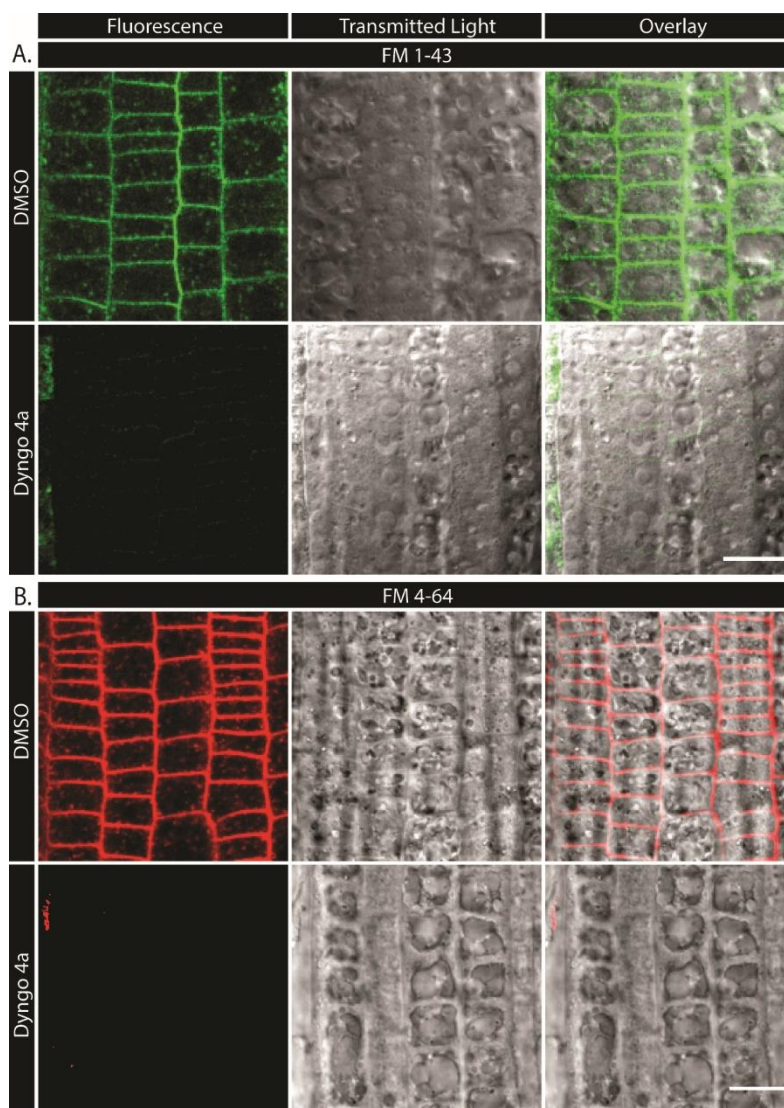

**Figure S5 –Dyngo 4a absorbs FM1-43 and FM 4-64 emission.** (Related to Figure 6).

Representative confocal images of the epidermal root cells, using the same microscope settings, incubated in control (DMSO) or Dyngo 4a (15 mins 30 μM) conditions in the presence of A) FM1-43 or B) FM4-64 membrane dyes. Scale bars = 20 μm.



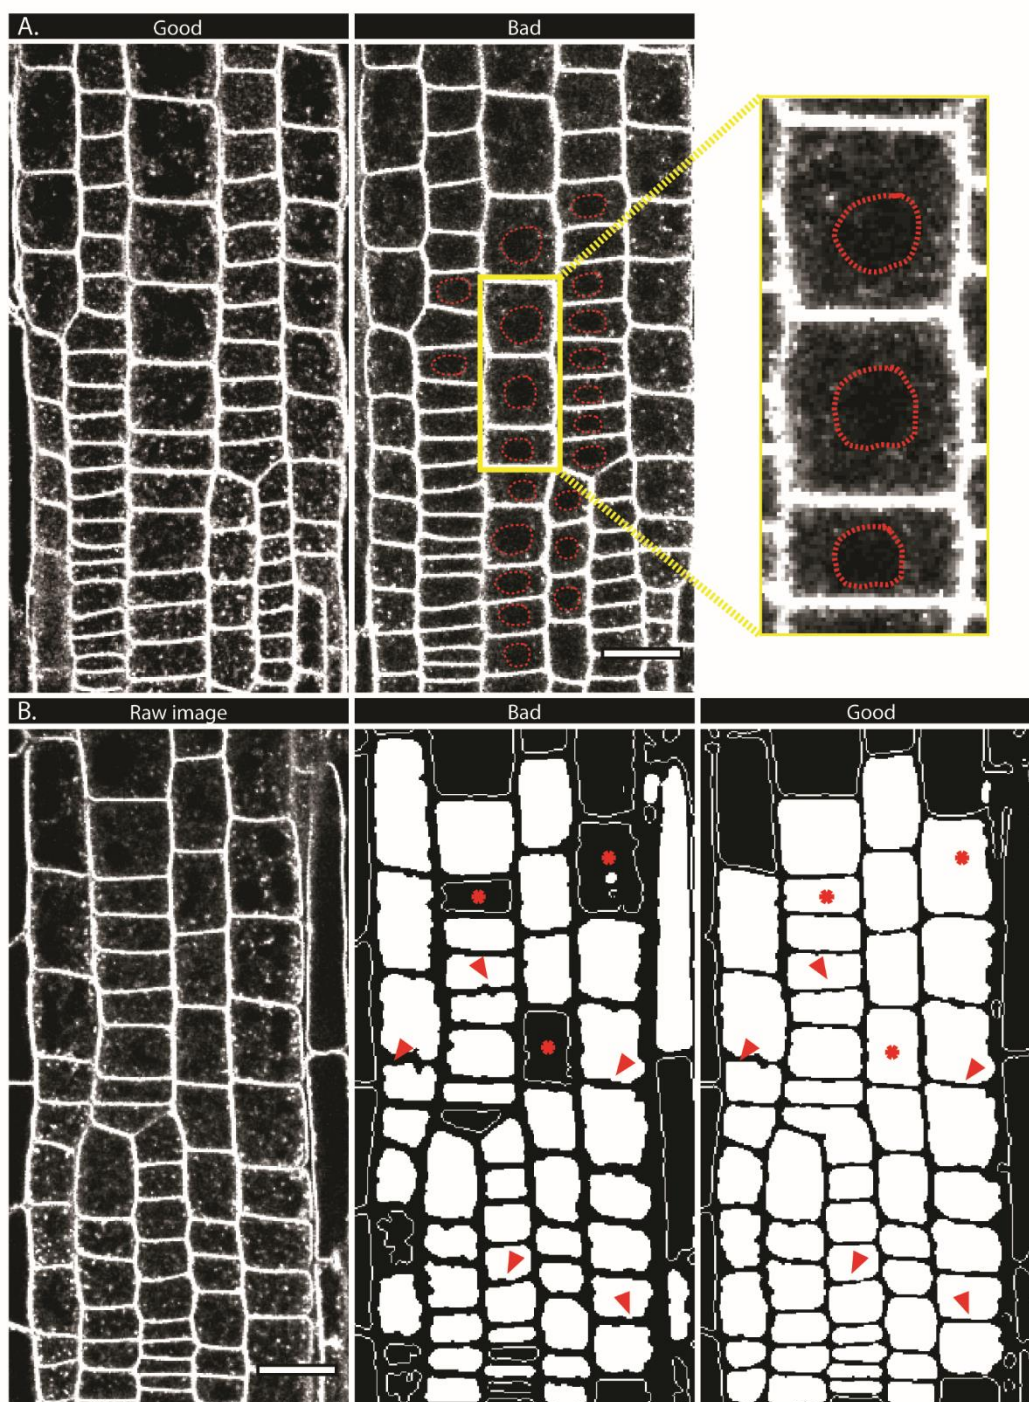

**Figure S6 – Comparison of FM cell selection and segmentation.** (Related to Figure 6).

A) Examples of poor z plane selection of FM images for analysis. A good example is shown on the left. The bad example (right) has dark black holes in the middles of the cell (red-dashed line outlines the vacuole, image in the middle). The yellow rectangle notes the zoomed in region of the example. B) Representative confocal image of the epidermal root cells incubated with FM4-64 and segmented images with a different threshold. If the threshold for the segmentation of the raw image (on the left) is set incorrectly, the edges of the cells have a lot of prominences (red arrows, middle image). The correct threshold will approximate the outlines to the actual shape of the cells (red arrows, right image). It is important to select only cells which are completely separated and do not interact with the outlines of neighboring cells. Scale bars = 20  $\mu\text{m}$ .

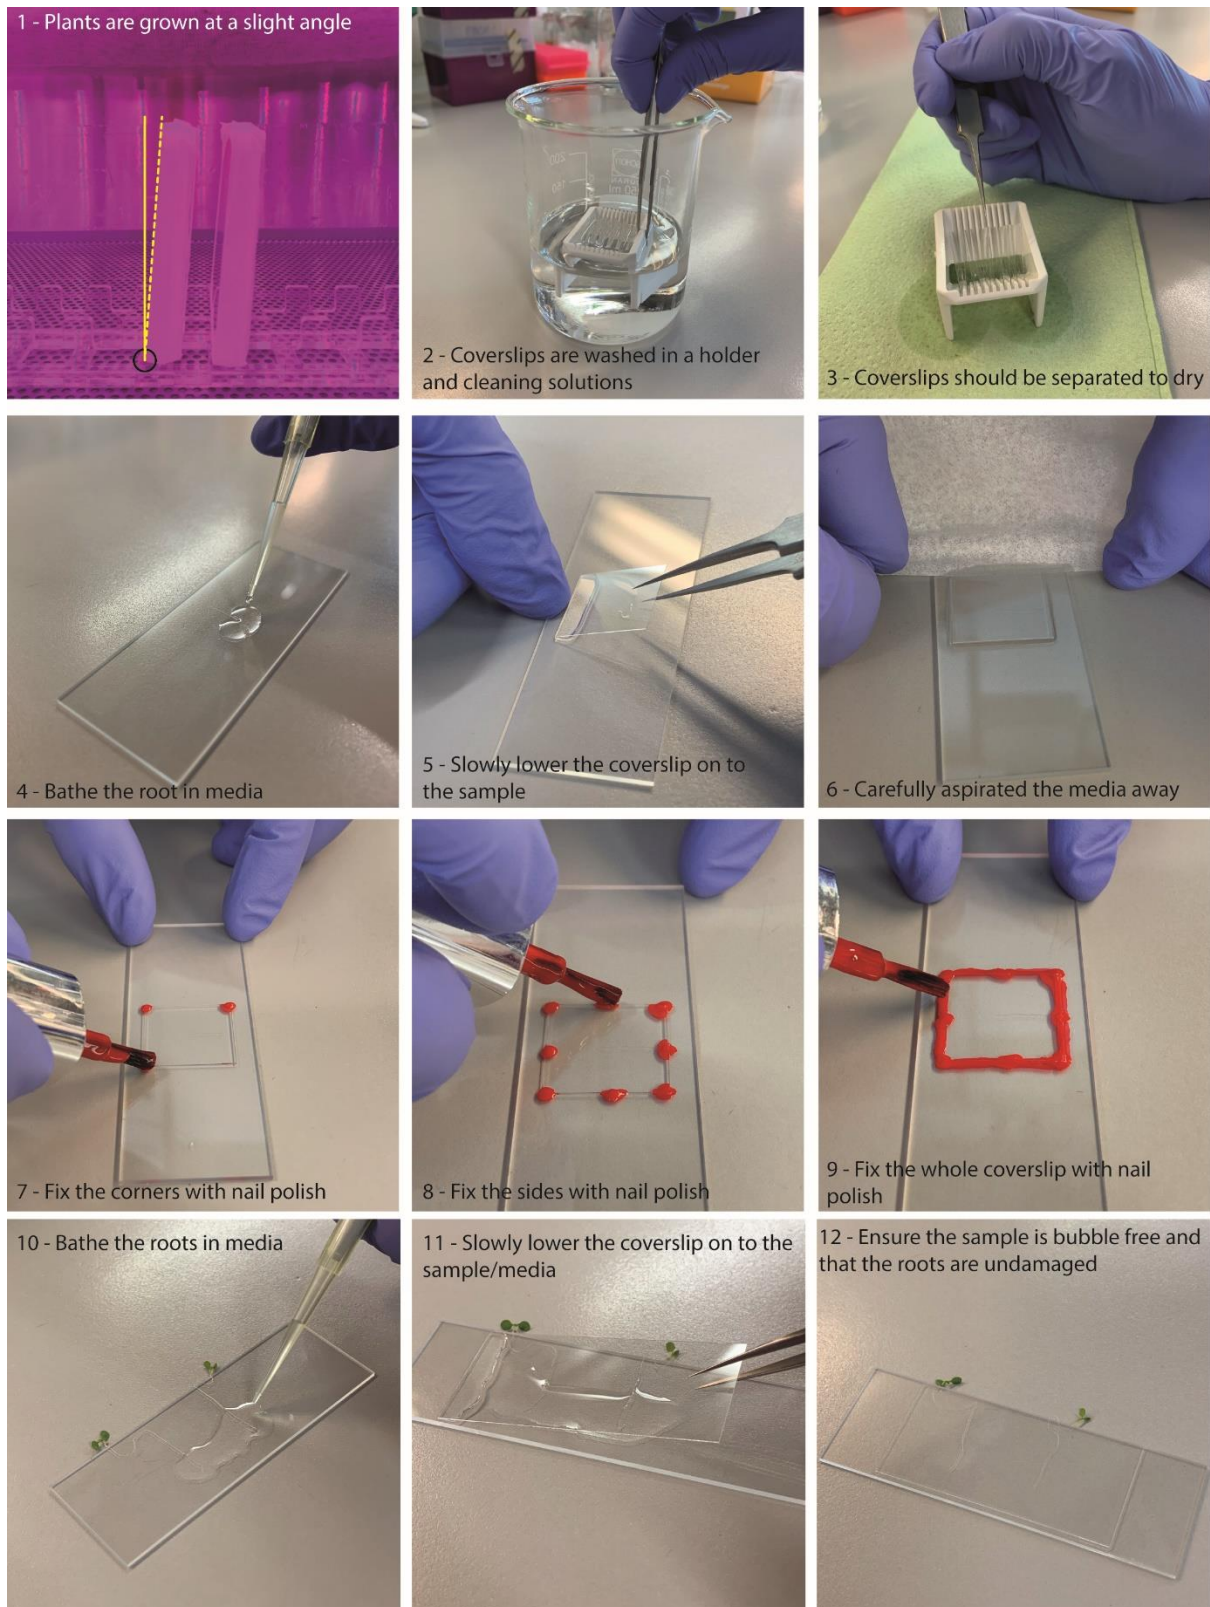

**Figure S7**

(1-9) Photos of TIRF-M sample preparation. (10-12) photos of FM sample preparation

**Supplemental Tables**

|                                        | <b>EM</b>                |                      | <b>TIRF-M</b>                              | <b>Confocal</b>           |                      |
|----------------------------------------|--------------------------|----------------------|--------------------------------------------|---------------------------|----------------------|
|                                        | <b>Resin Sections</b>    | <b>Metal Replica</b> |                                            | <b>Spinning Disk</b>      | <b>CLSM</b>          |
| <b>Effective resolution nm (x,y,z)</b> | 4, 4, 40-70              | 4,4,0*               | 200, 200, 100                              | 200, 200, ~500            | 200, 200, 500        |
| <b>Speed</b>                           | Fixed                    | Fixed                | Fastest                                    | Fast                      | Slow                 |
| <b>Florescence Sensitivity</b>         | -                        | -                    | High                                       | Low                       | Low                  |
| <b>CME Sample prep ease</b>            | Extreme                  | Hard                 | Hard                                       | Easy                      | Easy                 |
| <b>Best Application</b>                | Ultrastructural analysis |                      | Cell surface imaging                       |                           | Global uptake assays |
| <b>Major Pro</b>                       | Resolution               |                      | High signal to noise ratio on cell surface | Can image any tissue type |                      |
| <b>Major Con</b>                       | Fixed                    |                      | Only cell surface                          | Low sensitivity for EAPs  |                      |

\* There is not effective z resolution, as the image is of the surface of the replica.

**Table S1 – Comparison of the selected plant CME imaging technologies**



| Protein | Tag     | AGI number | Full Construct            | Background/<br>Ecotype | Functionality                                                            | References                                               |
|---------|---------|------------|---------------------------|------------------------|--------------------------------------------------------------------------|----------------------------------------------------------|
| AP2A1   | GFP     | AT5G22770  | p35s::AP2A1-GFP           | Col-0                  | -                                                                        | (Di Rubbo et al., 2013)                                  |
| AP2A1   | YFP     | AT5G22770  | p35s::AP2A1-YFP           | Col-0                  | -                                                                        | (Kim et al., 2013)                                       |
| AP2A1   | tagRFP  | AT5G22770  | pRPS5A::AP2A1-<br>mTagRFP | Col-0                  | -                                                                        | (Di Rubbo et al., 2013)                                  |
| AP2M    | GFP     | At4g46630  | pAP2M-AP2M-GFP            | <i>ap2m</i>            | Complements the significant FM4-64 internalization defect of <i>ap2m</i> | (Yamaoka et al., 2013)                                   |
| AP2M    | YFP     | At4g46630  | pAP2M-AP2M-GFP            | <i>m2-1/Col-0</i>      | Complements the significant FM4-64 internalization defect of <i>m2-1</i> | (Bashline et al., 2013)                                  |
| AP2S    | GFP     | At1g47830  | pAP2S::AP2s-GFP           | <i>ap2s</i>            | Full rescue of the developmental defects of <i>ap2s</i>                  | (Fan et al., 2013)                                       |
| AP2S    | mCherry | At1g47830  | pAP2S::AP2s-mCherry       | Col-0                  | -                                                                        | (Fan et al., 2013)                                       |
| CHC1    | GFP     | AT3G11130  | pRPS5A::CHC1-GFP          | Col-0                  | -                                                                        | (Dejonghe et al., 2016, Di Rubbo et al., 2013)           |
| CLC1    | GFP     | AT2G20760  | pCLC1::CLC1-GFP           | Col-0                  | -                                                                        | (Di Rubbo et al., 2013)                                  |
| CLC2    | mOrange | AT2G40060  | pCLC2::CLC2-mOrg          | WS and Col-0           | -                                                                        | WS (Konopka et al., 2008); Col-0 (Dejonghe et al., 2016) |
| CLC2    | GFP     | AT2G40060  | pCLC2::CLC2-GFP           | WS and Col-0           | -                                                                        | WS (Konopka et al., 2008); Col-0 (Di Rubbo et al., 2013, |

|        |         |           |                       |                      |                                                                                           |                                              |
|--------|---------|-----------|-----------------------|----------------------|-------------------------------------------------------------------------------------------|----------------------------------------------|
|        |         |           |                       |                      |                                                                                           | Fan et al., 2013, Dejonghe et al., 2016)     |
| CLC2   | GFP     | AT2G40060 | pRPS5A::CHC2-GFP      | Col-0                | -                                                                                         | (Ortiz-Morea et al., 2016)                   |
| CLC2   | mCherry | AT2G40060 | p35s::CLC2-mCherry    | Col-0                | -                                                                                         | (Van Damme et al., 2011)                     |
| CLC2   | tagRFP  | AT2G40060 | RPS5Ap::CLC2-TagRFP   | Col-0                | -                                                                                         | (Gadeyne et al., 2014)                       |
| CLC3   | GFP     | AT3G51890 | pCLC3::CLC3-GFP       | Col-0                | -                                                                                         | (Di Rubbo et al., 2013)                      |
| Drp1a  | mOrange | AT5G42080 | pDrp1a::Drp1a-mOrange | <i>drp1a-2</i> /WS   | Complements the infertility of <i>drp1a</i> mutant                                        | (Konopka and Bednarek, 2008)                 |
| Drp1a  | RFP     | AT5G42080 | p35s::Drp1a-mRFP1     | <i>drp1a</i> /Col-0  | Rescue of the developmental phenotypes of <i>drp1a</i> mutant plants                      | (Fujimoto et al., 2008, Mravec et al., 2011) |
| Drp1c  | GFP     | AT1G14830 | pDrp1c::Drp1c-GFP     | <i>drp1c-1</i> /WS   | Rescue of the development of <i>drp1C-1</i> pollen                                        | (Konopka et al., 2008)                       |
| Drp2a  | GFP     | AT1G10290 | pDrp2a::Drp2a-GFP     | Col-0                | -                                                                                         | (Huang et al., 2015)                         |
| Drp2b  | tagRFP  | AT1G59610 | pDrp2b::Drp2b-tagRFP  | Col-0                | -                                                                                         | (Huang et al., 2015)                         |
| Drp2b  | GFP     | AT1G59610 | p35s::Drp2b-GFP       | Col-0                | -                                                                                         | (Fujimoto et al., 2008)                      |
| TPLATE | GFP     | AT3G01780 | pTPLATE::TPLATE-GFP   | <i>tplate</i> /Col-0 | Rescue of the homozygous <i>tplate</i> mutant                                             | (Gadeyne et al., 2014)                       |
| TML    | GFP     | AT5G57460 | pTML::TML-GFP         | <i>tml-1</i> /Col-0  | Rescue of the male transmission failure of both <i>tml-1</i> / <i>tml-2</i> mutant allele | (Gadeyne et al., 2014)                       |

|         |     |           |                       |                        |                                                                                  |                         |
|---------|-----|-----------|-----------------------|------------------------|----------------------------------------------------------------------------------|-------------------------|
| TML     | YFP | AT5G57460 | pTML::TML-YFP         | <i>tml-1/Col-0</i>     | Rescue of the male transmission failure of both <i>tml-1/tml-2</i> mutant allele | (Gadeyne et al., 2014)  |
| LOLITA  | GFP | AT1G15370 | p35s::LOLITA-GFP      | Col-0                  | -                                                                                | (Gadeyne et al., 2014)  |
| TWD40-2 | GFP | AT5G24710 | p35s::TWD40-2-GFP     | Col-0                  | -                                                                                | (Gadeyne et al., 2014)  |
| TWD40-2 | GFP | AT5G24710 | pTWD40-2::GFP-TWD40-2 | <i>twd40-2-3/Col-0</i> | Rescue of the growth defects of <i>twd40-2-3</i>                                 | (Bashline et al., 2015) |
| TASH3   | GFP | AT2G07360 | p35s::TASH3-GFP       | Col-0                  | -                                                                                | (Gadeyne et al., 2014)  |
| atEH1   | GFP | AT1G20760 | p35s::atEH1-GFP       | Col-0                  | -                                                                                | (Gadeyne et al., 2014)  |
| atEH2   | GFP | AT1G21630 | p35s::atEH2-GFP       | Col-0                  | -                                                                                | (Gadeyne et al., 2014)  |

**Table S2 – Examples of key published Fluorescent clathrin and EAP markers lines**



**Table S2 – Published Fluorescent clathrin and EAP markers lines**

| <b>Drug</b> | <b>Effect</b>                                                           | <b>Mechanism</b>               | <b>Notes</b>                                                                                          | <b>Plant Tissue Tested</b>              | <b>Ref</b>                                                                               |
|-------------|-------------------------------------------------------------------------|--------------------------------|-------------------------------------------------------------------------------------------------------|-----------------------------------------|------------------------------------------------------------------------------------------|
| Dynasore    | Inhibited cargo internalization                                         | Dynamin GTPase inhibitor       | Reported off tagged effects on membrane ruffling                                                      | <i>Nicotiana benthamiana</i>            | (Sharfman et al., 2011)                                                                  |
| Dyngo 4a    | Prolonged CLC2 lifetime, reduced fixable FM uptake, block cargo uptake  | Dynamin GTPase inhibitor       | Absorbs light 500-700 nm, therefore not suitable for red imaging                                      | Seedlings, <i>Nicotiana benthamiana</i> | (Hunter et al., 2019, Zhang et al., 2017) and Figure S5                                  |
| ES9         | Very strong block of FM uptake, prolonged cell surface lifetime of EAPs | Binds CHC                      | It is a protonophore                                                                                  | Seedlings                               | (Dejonghe et al., 2016)                                                                  |
| ES9-17      | Very strong block of FM uptake, prolonged cell surface lifetime of EAPs | Binds CHC                      | Targets CHC, which is involved in other clathrin mediated processes                                   | Seedlings                               | (Dejonghe et al., 2019)                                                                  |
| IKA         | Reduced FM uptake, prolonged cell surface lifetime of EAPs              | Unknown                        | Appears to be specific for CME, however caution should be used as its mechanistic function is unknown | Seedlings, Pollen Tube, BY2 cells       | (Bandmann et al., 2012, Elkin et al., 2016, Moscatelli et al., 2007) and Figures 7 and 8 |
| Pitstop-2   | Reduced FM uptake                                                       | Disrupts clathrin interactions | Not CME specific and did not effect block internalization of cargo                                    | Seedlings                               | (Dejonghe et al., 2019, Dutta et al., 2012, von Kleist et al., 2011)                     |

**Table S3 – Chemical inhibitors of plant CME**

| Protein  | Gene         | AGI number | Function in CME                                                                                  | Modification                         | Phenotype                                                                                                          | Tissue                                         | References                                                                                      |
|----------|--------------|------------|--------------------------------------------------------------------------------------------------|--------------------------------------|--------------------------------------------------------------------------------------------------------------------|------------------------------------------------|-------------------------------------------------------------------------------------------------|
| Clathrin | <i>CHC1</i>  | AT3G11130  | Formation of clathrin triskelion                                                                 | pINTAM>>RFP-HUB1                     | Endocytic defect (inhibition of FM4-64 internalization)                                                            | Root, BY-2 cells                               | (Dhonukshe et al., 2007), (Tahara et al., 2007), (Robert et al., 2010), (Kitakura et al., 2011) |
| AP-2     | <i>AP2A1</i> | AT5G22770  | Adaptor complex that interacts with the membrane, clathrin, and CME accessory proteins and cargo | AP2A-RNAi                            | Endocytic defect (inhibition of FM4-64 internalization in root epidermal cells)                                    | Root                                           | (Di Rubbo et al., 2013)                                                                         |
|          | <i>AP2A2</i> | AT5G22780  |                                                                                                  | AP2MΔC                               | Endocytic defect (inhibition of FM4-64 internalization in root epidermal cells, defect in formation of BFA bodies) | Root                                           | (Di Rubbo et al., 2013), (Owen and Evans, 1998)                                                 |
|          | <i>AP2M</i>  | AT5G46630  |                                                                                                  |                                      |                                                                                                                    |                                                |                                                                                                 |
| AP180    | <i>AP180</i> | AT1G05020  | Adaptor protein involved in clathrin-mediated endocytosis                                        | At-AP180ΔENTH truncated version      | No showed effect <i>in vitro</i>                                                                                   | Cell suspension cultures of <i>A. thaliana</i> | (Barth and Holstein, 2004)                                                                      |
| Dynamins | <i>DRP1A</i> | AT5G42080  | CCV scission from PM / Putative role in CCV scission                                             | K47A point mutation in GTPase domain | Longer CLC lifetime                                                                                                | Root                                           | (Yoshinari et al., 2016)                                                                        |
|          | <i>DRP2A</i> | AT1G10290  |                                                                                                  | Inducible Strep-DRP2A-K51E           | Endocytic defect (reduced endocytosis in root hairs; bulging of the tip of root hairs,                             | Root                                           | (Taylor et al., 2011)                                                                           |
|          | <i>DRP2B</i> | AT1G59610  |                                                                                                  | Inducible Strep-DRP2B-K51E           |                                                                                                                    |                                                |                                                                                                 |

|                |                      |           |                                                                   |                                                  |                                                                                                                           |      |                                                    |
|----------------|----------------------|-----------|-------------------------------------------------------------------|--------------------------------------------------|---------------------------------------------------------------------------------------------------------------------------|------|----------------------------------------------------|
|                |                      |           |                                                                   |                                                  | and bursting of root hairs at the very tip)<br>Mutant cannot complement the knock-out phenotype                           |      |                                                    |
|                | <i>DRPIE</i>         | AT3G60190 | Potentially involved in CCV scission from PM                      | P77L point mutation in GTPase domain             | gain-of-function phenotype                                                                                                | Root | (Tang et al., 2006)                                |
| Auxilin        | <i>AUXILIN-LIKE1</i> | AT4G12780 | Negative regulation of endocytosis                                | XVE» <i>AUXILIN-LIKE1/2</i>                      | Block of endocytosis after the initial step by inhibition of recruitment of clathrin                                      | Root | (Adamowski et al., 2018, Ortiz-Morea et al., 2016) |
| TPLATE complex | <i>TML</i>           | AT5G57460 | TPLATE complex subunit involved in clathrin mediated endocytosis. | Truncated TML<br><i>TMLΔC</i><br><i>amiR-TML</i> | Endocytic defect (inhibition of FM4-64 internalization, defect in formation of BFA bodies, reduction in TPC complex size) | Root | (Gadeyne et al., 2014)                             |
|                | <i>TPLATE</i>        | AT3G01780 |                                                                   | <i>amiR-TPLATE</i>                               |                                                                                                                           |      |                                                    |

**Table S4 – Published genetic manipulations of plant CME**



|                      | <b>FM</b>                                          | <b>Photoconvertible fluorophore (e.g., Dendra)</b>              | <b>BFA</b>                         |
|----------------------|----------------------------------------------------|-----------------------------------------------------------------|------------------------------------|
| <b>Tissue tested</b> | Protoplasts and plants                             | Plants                                                          | Protoplasts and plants             |
| <b>Ease</b>          | Application/incubation of dye                      | Requires cloning and transformation                             | Application/incubation of compound |
| <b>Specificity</b>   | Not specific for CME, but total PM internalization | Dependent on cargo studied                                      | Dependent on cargo studied         |
| <b>Pros</b>          | Rapid and direct measure of PM endocytosis         | Specific for a certain cargo                                    | Rapid to establish assay           |
| <b>Cons</b>          | Not specific for CME                               | Takes time to generate material and cargo pathway must be known | Artificial BFA body                |

**Table S5 – Summary of example global uptake methods**

| <b>Protein</b> | <b>Gene</b>          | <b>AGI number</b> | <b>Phenotype</b>                                                                                                                                                                            | <b>References</b>                                                                      |
|----------------|----------------------|-------------------|---------------------------------------------------------------------------------------------------------------------------------------------------------------------------------------------|----------------------------------------------------------------------------------------|
| Clathrin       | <i>chc1</i>          | AT3G11130         | Reduced rates of endocytosis and defects clathrin mediated exocytosis                                                                                                                       | (Alonso et al., 2003), (Kitakura et al., 2011), (Larson et al., 2017)                  |
|                | <i>chc2</i>          | AT3G08530         | Reduced rates of endocytosis and defects clathrin mediated exocytosis                                                                                                                       |                                                                                        |
|                | <i>clc1</i>          | AT2G40060         | In homozygous form pollen is not viable                                                                                                                                                     | (Alonso et al., 2003), (Wang et al., 2013)                                             |
|                | <i>clc2</i>          | AT2G20760         | Numerous developmental defects                                                                                                                                                              |                                                                                        |
|                | <i>clc3</i>          | AT3G51890         | Numerous developmental defects                                                                                                                                                              |                                                                                        |
| AP-2           | <i>ap2m</i>          | AT5G46630         | Showed many developmental defects, including abnormal phyllotaxis, an increase in the number of shoots and branches, smaller leaves, an increase in the leaf number, and shorter root hairs | (Alonso et al., 2003), (Bashline et al., 2013, Kim et al., 2013, Yamaoka et al., 2013) |
|                | <i>ap2s</i>          | AT1G47830         | Localization and dynamics of CLC-EGFP are altered                                                                                                                                           | (Alonso et al., 2003), (Fan et al., 2013)                                              |
| AP180          | <i>ap180</i>         | AT2G25430         | No obvious growth or developmental defects were observed                                                                                                                                    | (Alonso et al., 2003), (Kaneda et al., 2019)                                           |
| Dynamins       | <i>drp1a</i>         | AT5G42080         | Inhibits fertilization due to maternal sporophytic defect                                                                                                                                   | (Alonso et al., 2003), (Kang et al., 2003a)                                            |
|                | <i>drp1c</i>         | AT1G14830         | Homozygous lethal (disrupts post-meiotic pollen development)                                                                                                                                | (Kang et al., 2003b)                                                                   |
|                | <i>drp1e</i>         | AT3G60190         | Null mutants have defects of cell plate formation in root and arrest of embryo development; enhanced cell death in response to powdery mildew infection                                     | (Alonso et al., 2003), (Fujimoto and Tsutsumi, 2014, Tang et al., 2006),               |
|                | <i>drp2a</i>         | AT1G10290         | No obvious growth or developmental defects were observed                                                                                                                                    | (Alonso et al., 2003), (Backues et al., 2010)                                          |
|                | <i>drp2b</i>         | AT1G59610         | No obvious growth or developmental defects were observed                                                                                                                                    |                                                                                        |
| Auxilin        | <i>auxilin-like1</i> | AT4G12780         | Phenotypically normal                                                                                                                                                                       | (Adamowski et al., 2018)                                                               |
|                | <i>auxilin-like2</i> | AT4G12770         | Phenotypically normal                                                                                                                                                                       |                                                                                        |
| TPLATE complex | <i>tplate</i>        | AT1G07670         | Embryo-lethal                                                                                                                                                                               | (Alonso et al., 2003), (Gadeyne et al., 2014)                                          |
|                | <i>tml</i>           | AT5G57460         | Embryo-lethal                                                                                                                                                                               |                                                                                        |

|  |                |           |                                      |                                                   |
|--|----------------|-----------|--------------------------------------|---------------------------------------------------|
|  | <i>twd40-2</i> | AT5G24710 | Reduced rates of membrane dye uptake | (Alonso et al., 2003),<br>(Bashline et al., 2015) |
|--|----------------|-----------|--------------------------------------|---------------------------------------------------|

**Table S6 – Published and characterized mutant EAP lines**



## **Supplemental References**

- ADAMOWSKI, M., NARASIMHAN, M., KANIA, U., GLANC, M., DE JAEGER, G. & FRIML, J. 2018. A Functional Study of AUXILIN-LIKE1 and 2, Two Putative Clathrin Uncoating Factors in Arabidopsis. *Plant Cell*, 30, 700-716.
- ALONSO, J. M., STEPANOVA, A. N., LEISSE, T. J., KIM, C. J., CHEN, H., SHINN, P., STEVENSON, D. K., ZIMMERMAN, J., BARAJAS, P., CHEUK, R., GADRINAB, C., HELLER, C., JESKE, A., KOESEMA, E., MEYERS, C. C., PARKER, H., PREDNIS, L., ANSARI, Y., CHOY, N., DEEN, H., GERALT, M., HAZARI, N., HOM, E., KARNES, M., MULHOLLAND, C., NDUBAKU, R., SCHMIDT, I., GUZMAN, P., AGUILAR-HENONIN, L., SCHMID, M., WEIGEL, D., CARTER, D. E., MARCHAND, T., RISSEEUW, E., BROGDEN, D., ZEKO, A., CROSBY, W. L., BERRY, C. C. & ECKER, J. R. 2003. Genome-wide insertional mutagenesis of Arabidopsis thaliana. *Science*, 301, 653-7.
- BACKUES, S. K., KORASICK, D. A., HEESE, A. & BEDNAREK, S. Y. 2010. The Arabidopsis dynamin-related protein2 family is essential for gametophyte development. *Plant Cell*, 22, 3218-31.
- BANDMANN, V., MULLER, J. D., KOHLER, T. & HOMANN, U. 2012. Uptake of fluorescent nano beads into BY2-cells involves clathrin-dependent and clathrin-independent endocytosis. *FEBS Lett*, 586, 3626-32.
- BARTH, M. & HOLSTEIN, S. E. 2004. Identification and functional characterization of Arabidopsis AP180, a binding partner of plant alphaC-adaptin. *J Cell Sci*, 117, 2051-62.
- BASHLINE, L., LI, S., ANDERSON, C. T., LEI, L. & GU, Y. 2013. The endocytosis of cellulose synthase in Arabidopsis is dependent on mu2, a clathrin-mediated endocytosis adaptin. *Plant Physiol*, 163, 150-60.
- BASHLINE, L., LI, S., ZHU, X. & GU, Y. 2015. The TWD40-2 protein and the AP2 complex cooperate in the clathrin-mediated endocytosis of cellulose synthase to regulate cellulose biosynthesis. *Proc Natl Acad Sci U S A*, 112, 12870-5.
- DEJONGHE, W., KUENEN, S., MYLLE, E., VASILEVA, M., KEECH, O., VIOTTI, C., SWERTS, J., FENDRYCH, M., ORTIZ-MOREA, F. A., MISHEV, K., DELANG, S., SCHOLL, S., ZARZA, X., HEILMANN, M., KOURELIS, J., KASPROWICZ, J., NGUYEN LE, S. L., DROZDZECKI, A., VAN HOUTTE, I., SZATMARI, A. M., MAJDA, M., BAISA, G., BEDNAREK, S. Y., ROBERT, S., AUDENAERT, D., TESTERINK, C., MUNNIK, T., VAN DAMME, D., HEILMANN, I., SCHUMACHER, K., WINNE, J., FRIML, J., VERSTREKEN, P. & RUSSINOVA, E. 2016. Mitochondrial uncouplers inhibit clathrin-mediated endocytosis largely through cytoplasmic acidification. *Nat Commun*, 7, 11710.
- DEJONGHE, W., SHARMA, I., DENOO, B., DE MUNCK, S., LU, Q., MISHEV, K., BULUT, H., MYLLE, E., DE RYCKE, R., VASILEVA, M., SAVATIN, D. V., NERINCKX, W., STAES, A., DROZDZECKI, A., AUDENAERT, D., YPERMAN, K., MADDER, A., FRIML, J., VAN DAMME, D., GEVAERT, K., HAUCKE, V., SAVVIDES, S. N., WINNE, J. & RUSSINOVA, E. 2019. Disruption of endocytosis through chemical inhibition of clathrin heavy chain function. *Nat Chem Biol*, 15, 641-649.
- DHONUKSHE, P., ANIENTO, F., HWANG, I., ROBINSON, D. G., MRAVEC, J., STIERHOF, Y. D. & FRIML, J. 2007. Clathrin-mediated constitutive endocytosis of PIN auxin efflux carriers in Arabidopsis. *Curr Biol*, 17, 520-7.
- DI RUBBO, S., IRANI, N. G., KIM, S. Y., XU, Z. Y., GADEYNE, A., DEJONGHE, W., VANHOUTTE, I., PERSIAU, G., ECKHOUT, D., SIMON, S., SONG, K., KLEINE-

- VEHN, J., FRIML, J., DE JAEGER, G., VAN DAMME, D., HWANG, I. & RUSSINOVA, E. 2013. The clathrin adaptor complex AP-2 mediates endocytosis of brassinosteroid insensitive1 in Arabidopsis. *Plant Cell*, 25, 2986-97.
- DUTTA, D., WILLIAMSON, C. D., COLE, N. B. & DONALDSON, J. G. 2012. Pitstop 2 is a potent inhibitor of clathrin-independent endocytosis. *PLoS One*, 7, e45799.
- ELKIN, S. R., OSWALD, N. W., REED, D. K., METTLEN, M., MACMILLAN, J. B. & SCHMID, S. L. 2016. Ikarugamycin: A Natural Product Inhibitor of Clathrin-Mediated Endocytosis. *Traffic*, 17, 1139-49.
- FAN, L., HAO, H., XUE, Y., ZHANG, L., SONG, K., DING, Z., BOTELLA, M. A., WANG, H. & LIN, J. 2013. Dynamic analysis of Arabidopsis AP2 sigma subunit reveals a key role in clathrin-mediated endocytosis and plant development. *Development*, 140, 3826-37.
- FUJIMOTO, M., ARIMURA, S., NAKAZONO, M. & TSUTSUMI, N. 2008. Arabidopsis dynamin-related protein DRP2B is co-localized with DRP1A on the leading edge of the forming cell plate. *Plant Cell Rep*, 27, 1581-6.
- FUJIMOTO, M. & TSUTSUMI, N. 2014. Dynamin-related proteins in plant post-Golgi traffic. *Front Plant Sci*, 5, 408.
- GADEYNE, A., SANCHEZ-RODRIGUEZ, C., VANNESTE, S., DI RUBBO, S., ZAUBER, H., VANNESTE, K., VAN LEENE, J., DE WINNE, N., EECKHOUT, D., PERSIAU, G., VAN DE SLIJKE, E., CANNOOT, B., VERCRUYSSSE, L., MAYERS, J. R., ADAMOWSKI, M., KANIA, U., EHRLICH, M., SCHWEIGHOFER, A., KETELAAR, T., MAERE, S., BEDNAREK, S. Y., FRIML, J., GEVAERT, K., WITTERS, E., RUSSINOVA, E., PERSSON, S., DE JAEGER, G. & VAN DAMME, D. 2014. The TPLATE adaptor complex drives clathrin-mediated endocytosis in plants. *Cell*, 156, 691-704.
- HUANG, J., FUJIMOTO, M., FUJIWARA, M., FUKAO, Y., ARIMURA, S. & TSUTSUMI, N. 2015. Arabidopsis dynamin-related proteins, DRP2A and DRP2B, function coordinately in post-Golgi trafficking. *Biochem Biophys Res Commun*, 456, 238-44.
- HUNTER, K., KIMURA, S., ROKKA, A., TRAN, H. C., TOYOTA, M., KUKKONEN, J. P. & WRZACZEK, M. 2019. CRK2 Enhances Salt Tolerance by Regulating Callose Deposition in Connection with PLDalpha1. *Plant Physiol*, 180, 2004-2021.
- KANEDA, M., VAN OOSTENDE-TRIPLET, C., CHEBLI, Y., TESTERINK, C., BEDNAREK, S. Y. & GEITMANN, A. 2019. Plant AP180 N-Terminal Homolog Proteins Are Involved in Clathrin-Dependent Endocytosis during Pollen Tube Growth in Arabidopsis thaliana. *Plant Cell Physiol*, 60, 1316-1330.
- KANG, B. H., BUSSE, J. S. & BEDNAREK, S. Y. 2003a. Members of the Arabidopsis dynamin-like gene family, ADL1, are essential for plant cytokinesis and polarized cell growth. *Plant Cell*, 15, 899-913.
- KANG, B. H., RANCOUR, D. M. & BEDNAREK, S. Y. 2003b. The dynamin-like protein ADL1C is essential for plasma membrane maintenance during pollen maturation. *Plant J*, 35, 1-15.
- KIM, S. Y., XU, Z. Y., SONG, K., KIM, D. H., KANG, H., REICHARDT, I., SOHN, E. J., FRIML, J., JUERGENS, G. & HWANG, I. 2013. Adaptor protein complex 2-mediated endocytosis is crucial for male reproductive organ development in Arabidopsis. *Plant Cell*, 25, 2970-85.
- KITAKURA, S., VANNESTE, S., ROBERT, S., LOFKE, C., TEICHMANN, T., TANAKA, H. & FRIML, J. 2011. Clathrin mediates endocytosis and polar distribution of PIN auxin transporters in Arabidopsis. *Plant Cell*, 23, 1920-31.

- KONOPKA, C. A., BACKUES, S. K. & BEDNAREK, S. Y. 2008. Dynamics of Arabidopsis dynamin-related protein 1C and a clathrin light chain at the plasma membrane. *Plant Cell*, 20, 1363-80.
- KONOPKA, C. A. & BEDNAREK, S. Y. 2008. Comparison of the dynamics and functional redundancy of the Arabidopsis dynamin-related isoforms DRP1A and DRP1C during plant development. *Plant Physiol*, 147, 1590-602.
- LARSON, E. R., VAN ZELM, E., ROUX, C., MARION-POLL, A. & BLATT, M. R. 2017. Clathrin Heavy Chain Subunits Coordinate Endo- and Exocytic Traffic and Affect Stomatal Movement. *Plant Physiol*, 175, 708-720.
- MOSCATELLI, A., CIAMPOLINI, F., RODIGHIERO, S., ONELLI, E., CRESTI, M., SANTO, N. & IDILLI, A. 2007. Distinct endocytic pathways identified in tobacco pollen tubes using charged nanogold. *J Cell Sci*, 120, 3804-19.
- MRAVEC, J., PETRASEK, J., LI, N., BOEREN, S., KARLOVA, R., KITAKURA, S., PAREZOVA, M., NARAMOTO, S., NODZYNSKI, T., DHONUKSHE, P., BEDNAREK, S. Y., ZAZIMALOVA, E., DE VRIES, S. & FRIML, J. 2011. Cell plate restricted association of DRP1A and PIN proteins is required for cell polarity establishment in Arabidopsis. *Curr Biol*, 21, 1055-60.
- ORTIZ-MOREA, F. A., SAVATIN, D. V., DEJONGHE, W., KUMAR, R., LUO, Y., ADAMOWSKI, M., VAN DEN BEGIN, J., DRESSANO, K., PEREIRA DE OLIVEIRA, G., ZHAO, X., LU, Q., MADDER, A., FRIML, J., SCHERER DE MOURA, D. & RUSSINOVA, E. 2016. Danger-associated peptide signaling in Arabidopsis requires clathrin. *Proc Natl Acad Sci U S A*, 113, 11028-33.
- OWEN, D. J. & EVANS, P. R. 1998. A structural explanation for the recognition of tyrosine-based endocytotic signals. *Science*, 282, 1327-32.
- ROBERT, S., KLEINE-VEHN, J., BARBEZ, E., SAUER, M., PACIOREK, T., BASTER, P., VANNESTE, S., ZHANG, J., SIMON, S., COVANOVA, M., HAYASHI, K., DHONUKSHE, P., YANG, Z., BEDNAREK, S. Y., JONES, A. M., LUSCHNIG, C., ANIENTO, F., ZAZIMALOVA, E. & FRIML, J. 2010. ABP1 mediates auxin inhibition of clathrin-dependent endocytosis in Arabidopsis. *Cell*, 143, 111-21.
- SHARFMAN, M., BAR, M., EHRLICH, M., SCHUSTER, S., MELECH-BONFIL, S., EZER, R., SESSA, G. & AVNI, A. 2011. Endosomal signaling of the tomato leucine-rich repeat receptor-like protein LeEix2. *Plant J*, 68, 413-23.
- TAHARA, H., YOKOTA, E., IGARASHI, H., ORII, H., YAO, M., SONOBE, S., HASHIMOTO, T., HUSSEY, P. J. & SHIMMEN, T. 2007. Clathrin is involved in organization of mitotic spindle and phragmoplast as well as in endocytosis in tobacco cell cultures. *Protoplasma*, 230, 1-11.
- TANG, D., ADE, J., FRYE, C. A. & INNES, R. W. 2006. A mutation in the GTP hydrolysis site of Arabidopsis dynamin-related protein 1E confers enhanced cell death in response to powdery mildew infection. *Plant J*, 47, 75-84.
- TAYLOR, M. J., PERRAIS, D. & MERRIFIELD, C. J. 2011. A high precision survey of the molecular dynamics of mammalian clathrin-mediated endocytosis. *PLoS Biol*, 9, e1000604.
- VAN DAMME, D., GADEYNE, A., VANSTRAELEN, M., INZE, D., VAN MONTAGU, M. C., DE JAEGER, G., RUSSINOVA, E. & GEELLEN, D. 2011. Adaptin-like protein TPLATE and clathrin recruitment during plant somatic cytokinesis occurs via two distinct pathways. *Proc Natl Acad Sci U S A*, 108, 615-20.
- VON KLEIST, L., STAHLSCHMIDT, W., BULUT, H., GROMOVA, K., PUCHKOV, D., ROBERTSON, M. J., MACGREGOR, K. A., TOMILIN, N., PECHSTEIN, A., CHAU, N., CHIRCOP, M., SAKOFF, J., VON KRIES, J. P., SAENGER, W., KRAUSSLICH, H. G., SHUPLIAKOV, O., ROBINSON, P. J., MCCLUSKEY, A. & HAUCKE, V.

2011. Role of the clathrin terminal domain in regulating coated pit dynamics revealed by small molecule inhibition. *Cell*, 146, 471-84.
- WANG, C., YAN, X., CHEN, Q., JIANG, N., FU, W., MA, B., LIU, J., LI, C., BEDNAREK, S. Y. & PAN, J. 2013. Clathrin light chains regulate clathrin-mediated trafficking, auxin signaling, and development in Arabidopsis. *Plant Cell*, 25, 499-516.
- YAMAOKA, S., SHIMONO, Y., SHIRAKAWA, M., FUKAO, Y., KAWASE, T., HATSUGAI, N., TAMURA, K., SHIMADA, T. & HARA-NISHIMURA, I. 2013. Identification and dynamics of Arabidopsis adaptor protein-2 complex and its involvement in floral organ development. *Plant Cell*, 25, 2958-69.
- YOSHINARI, A., FUJIMOTO, M., UEDA, T., INADA, N., NAITO, S. & TAKANO, J. 2016. DRP1-Dependent Endocytosis is Essential for Polar Localization and Boron-Induced Degradation of the Borate Transporter BOR1 in Arabidopsis thaliana. *Plant Cell Physiol*, 57, 1985-2000.
- ZHANG, H. M., COLYVAS, K., PATRICK, J. W. & OFFLER, C. E. 2017. A Ca<sup>2+</sup>-dependent remodelled actin network directs vesicle trafficking to build wall ingrowth papillae in transfer cells. *J Exp Bot*, 68, 4749-4764.
